# Supplementary material for: Self-sacrificed synthesis of carbon-coated SiOx nanowires for high capacity lithium ion battery anodes
Source: Royal Society of Chemistry journal article supplement (doi:10.1039/c6ta10583a), 2017-01-01
Supplement: c6ta10583a1.pdf [file c6ta10583a1.pdf]

## Supporting Information

### **Self-Sacrificed Synthesis of Carbon-Coated SiO<sub>x</sub> Nanowires for High Capacity Lithium Ion Battery Anode**

Zhaohuai Li<sup>a</sup>, Qiu He<sup>a</sup>, Liang He<sup>a\*</sup>, Ping Hu<sup>a</sup>, Wei Li<sup>b</sup>, Haowu Yan<sup>a</sup>, Xianzhou Peng<sup>a</sup>, Congyun Huang<sup>b</sup>, and Liqiang Mai<sup>a\*</sup>

<sup>a</sup> State Key Laboratory of Advanced Technology for Materials Synthesis and Processing,  
Wuhan University of Technology, Wuhan 430070, P. R. China

<sup>b</sup> School of Materials Science and Engineering, Wuhan University of Technology, Wuhan  
430070, P. R. China

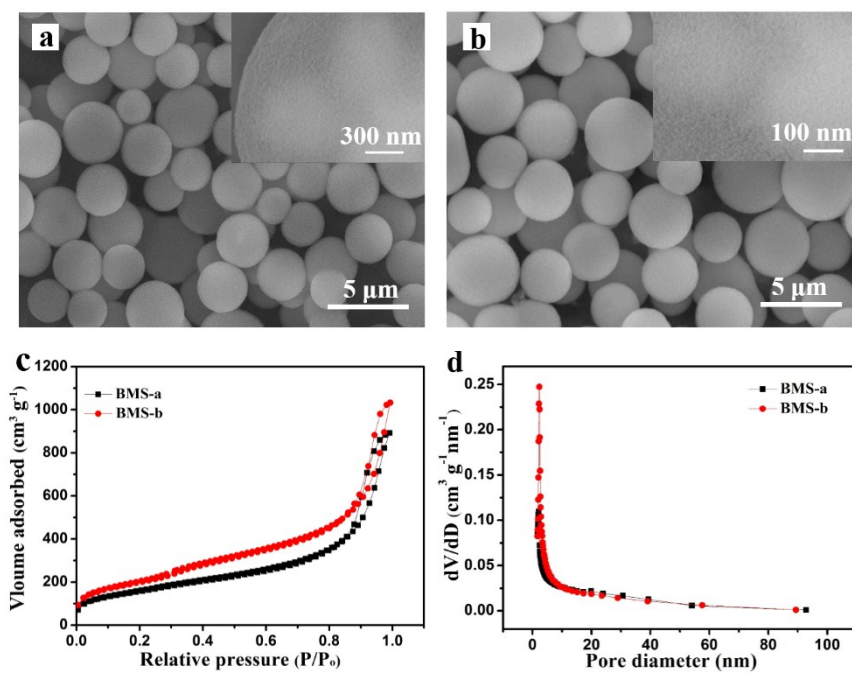

**Fig. S1** Typical SEM images of BMS-a (a) and BMS-b (b) (inset is the SEM image with higher magnification), and BJH (c) and pore size distribution curves (d) of BMS-a and BMS-b.

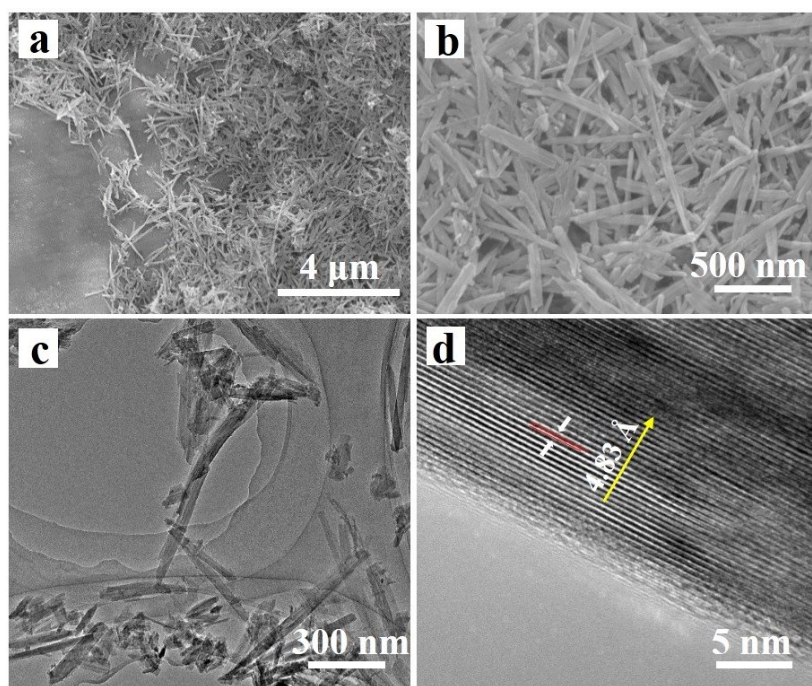

**Fig. S2** SEM (a, b), TEM (c) and HRTEM (d) images of SiO<sub>x</sub> NWs-b.

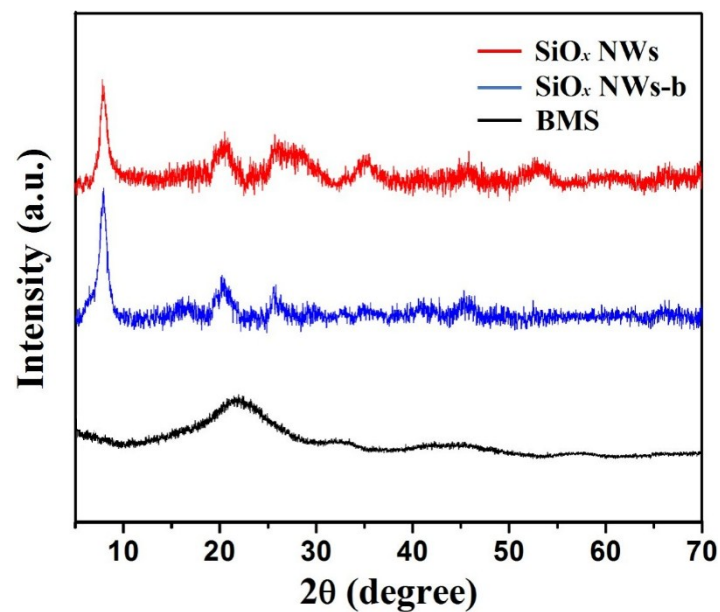

**Fig. S3** XRD patterns of BMS precursor and as-synthesized  $\text{SiO}_x$  NWs.

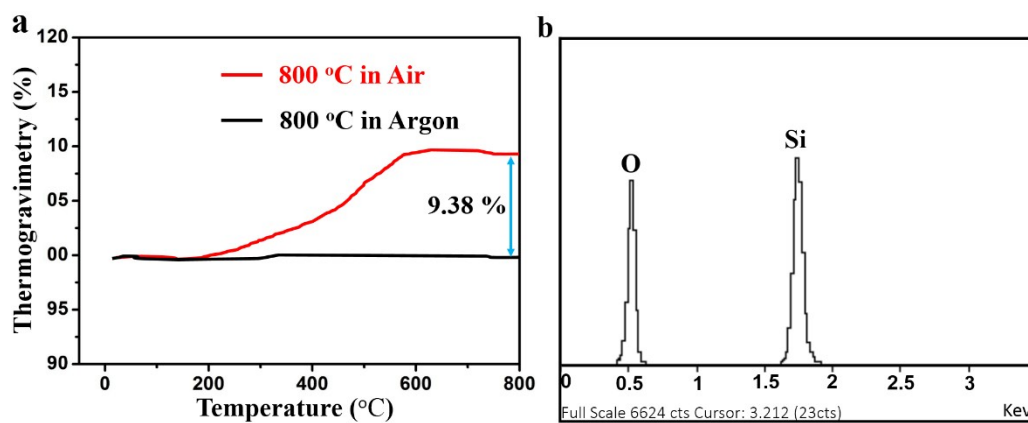

**Fig. S4** (a) TGA curves of  $\text{SiO}_x$  NWs in air and argon atmosphere (flow of 100 ml/min and a heating rate of 10 °C/min). (b) The EDS of  $\text{SiO}_x$  NWs after annealing in air at 800 °C. The concentration of oxygen vacancies is calculated from the difference in weight increase between the two TGA curves.

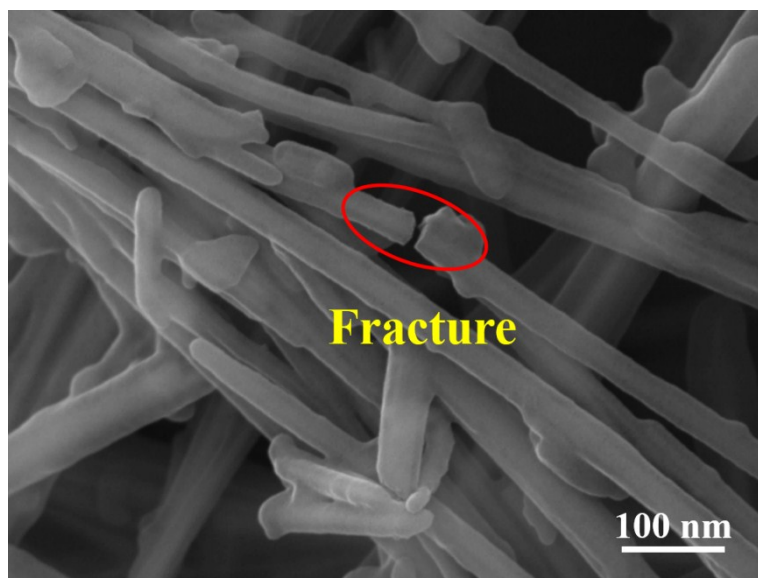

**Fig. S5** Typical SEM image of RF-SiO<sub>x</sub> NWs. The area marked by red circle shows the existence of fracture in RF-SiO<sub>x</sub> NWs.

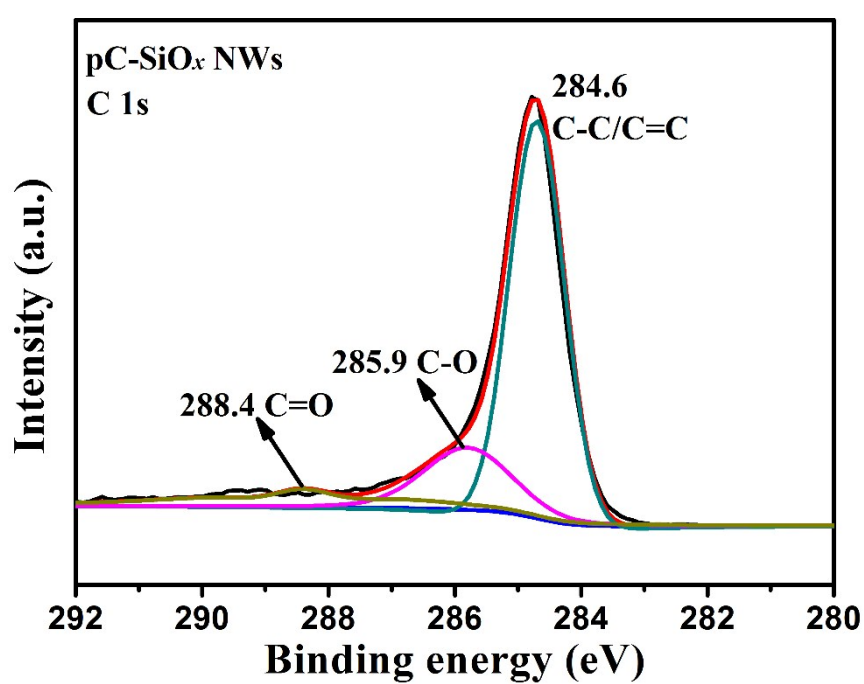

**Fig. S6** High-resolution C 1s XPS spectrum of pC-SiO<sub>x</sub> NWs.

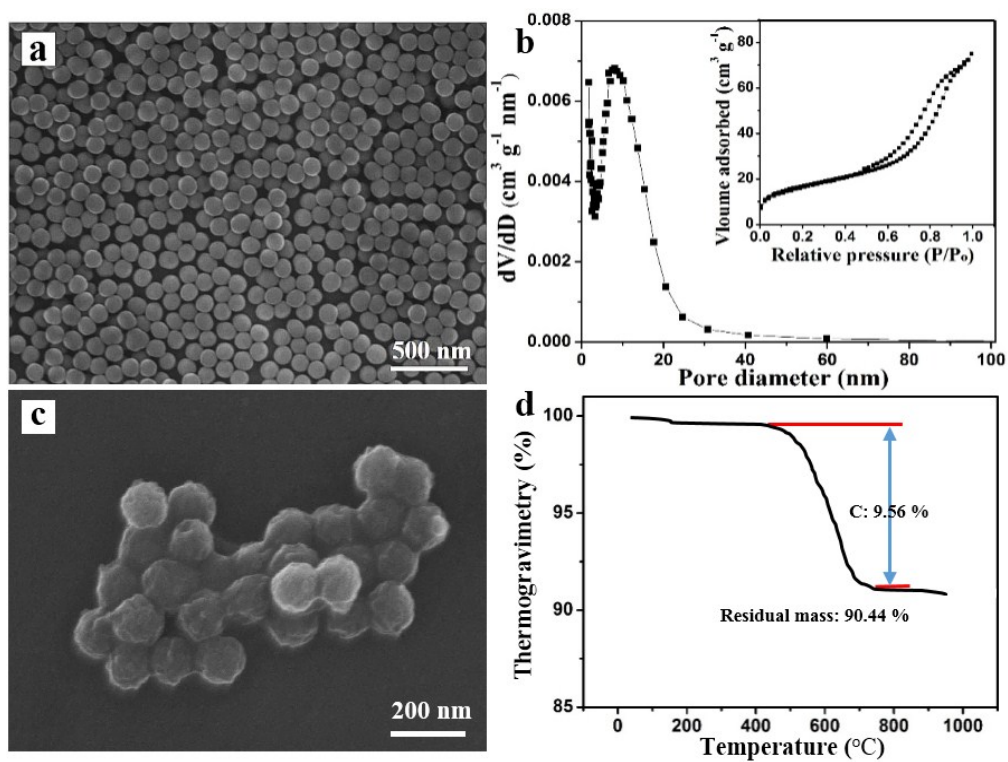

**Fig. S7** (a) SEM image of p-SiO<sub>2</sub> NPs and (b) corresponding BET curves. (c) SEM image of pC-p-SiO<sub>2</sub> NPs and (d) corresponding TGA profile.

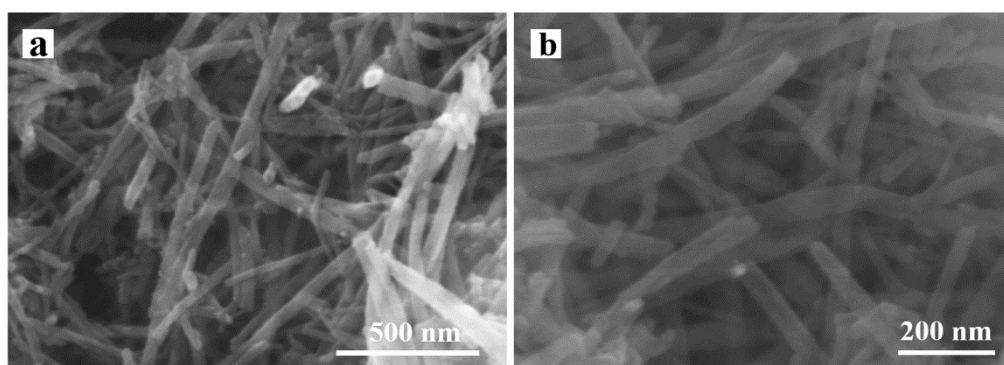

**Fig. S8** SEM images of pC-SiO<sub>x</sub> NWs after 150 electrochemical cycles at a current density of 500 mA g<sup>-1</sup>.
